# Supplementary material
Source: MDPI journal article supplement (https://www.mdpi.com/2504-463X/3/4/7)
Supplement: s1 [file s1]

---

**Table S1.** Detailed search strategies used to retrieve articles.

| Database       | Search Strategy                                                                                                                                                                                                                                                                                                                                                                     | Results |
|----------------|-------------------------------------------------------------------------------------------------------------------------------------------------------------------------------------------------------------------------------------------------------------------------------------------------------------------------------------------------------------------------------------|---------|
| PubMed         | ("machine learning" OR "artificial intelligence" OR "deep learning" OR "neural networks" OR "pattern recognition" OR "decision tree" OR "SVM" OR "random forest") AND ("vestibular schwannoma" OR "cranial nerve schwannoma" OR "acoustic neuroma" OR "cerebellopontine angle" OR "lateral skull base" OR "lateral skull base" OR "glomus") Filters: English                        | 44      |
| Web of Science | TOPIC: ("machine learning" OR "artificial intelligence" OR "deep learning" OR "neural networks" OR "pattern recognition" OR "decision tree" OR "SVM" OR "random forest") AND ("vestibular schwannoma" OR "cranial nerve schwannoma" OR "acoustic neuroma" OR "cerebellopontine angle" OR "lateral skull base" OR "lateral skull base" OR "glomus") Refined by: LANGUAGES: (ENGLISH) | 38      |
